# Supplementary material
Source: PubMed Central journal article supplement (PMC11607727)
Supplement: NIHMS2037023-supplement-1.pdf [file NIHMS2037023-supplement-1.pdf]

## SUPPLEMENTS

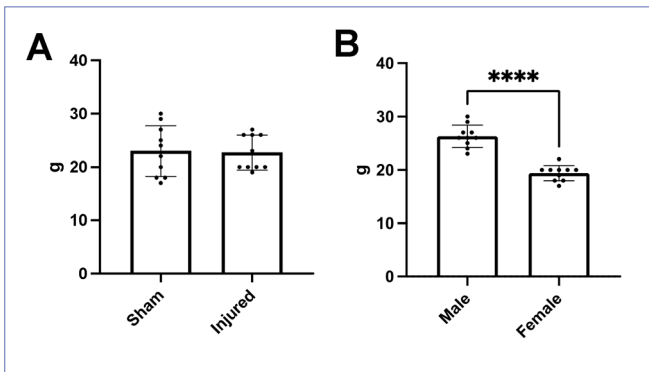

**Appendix 1. (A)** Average weights of sham and injured groups at PREOP; **(B)** Average weights of males and females at PREOP.

n = 10 mice; \*\*\*\*p < 0.0001.

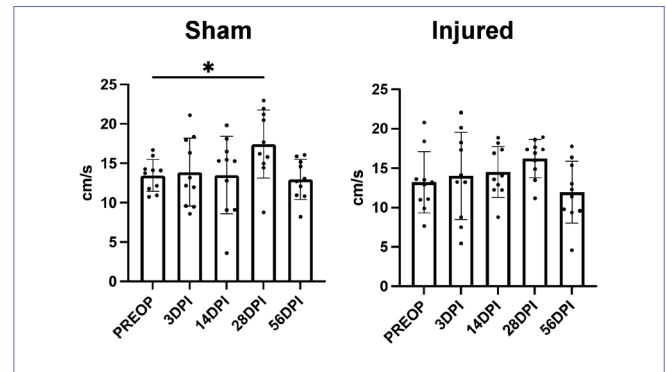

**Appendix 2. (A)** Average speeds for sham and injured groups overtime; **(B)** Average speeds of injured males and females overtime.

n = 10 mice; \*p < 0.05.
